# Supplementary material for: Immunotherapy for Infarcts: In Vivo Postinfarction Macrophage Modulation Using Intramyocardial Microparticle Delivery of Map4k4 Small Interfering RNA
Source: PubMed Central journal article supplement (PMC7757732; doi:10.1089/biores.2020.0037), 2020-12-02
Supplement: Supp_Fig2.pdf [file Supp_Fig2.pdf]

## SUPPLEMENTARY DATA

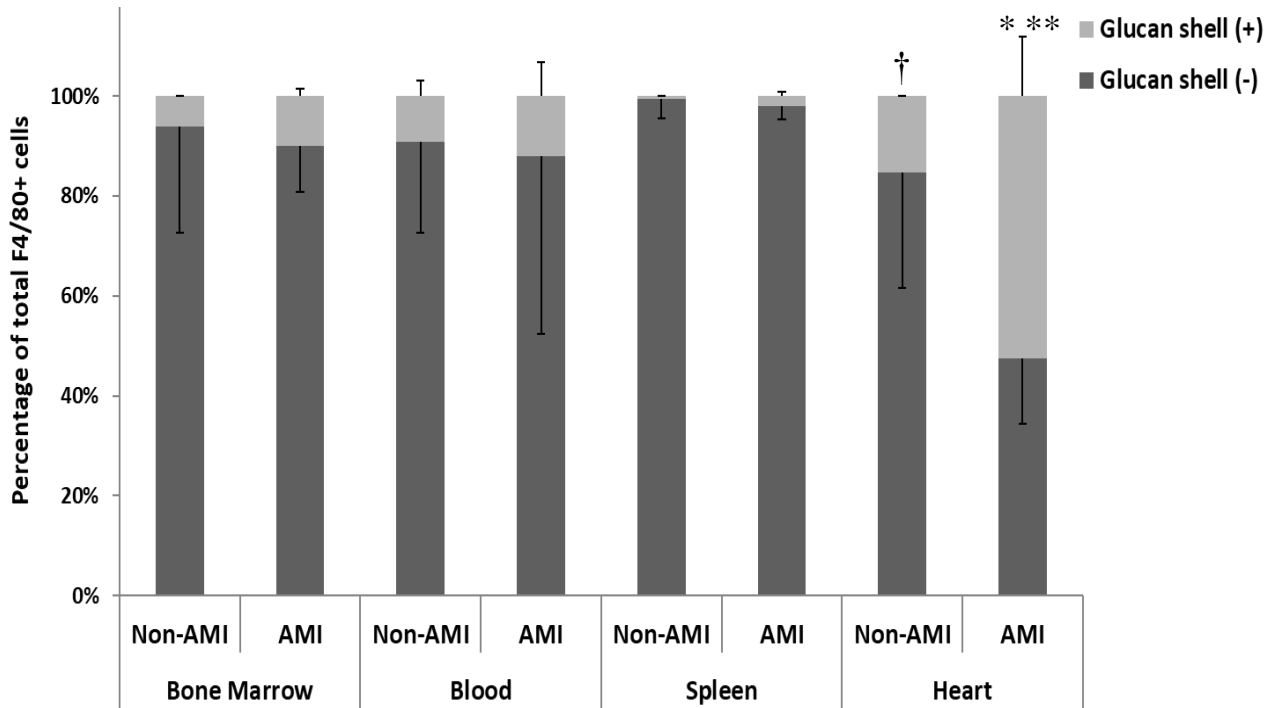

**SUPPLEMENTARY FIG. S2.** Percentage of total macrophages with ingested GeRPs in various organs. Empty GeRP particles were injected into hearts with acute myocardial infarcts (AMI) or into normal ventricles (non-AMI). CD11b<sup>+</sup>/F4/80<sup>+</sup> macrophage populations in whole hearts, bone marrow, peripheral blood, and spleen were assessed by flow cytometry at 7 days following infarction and injection. Those with phagocytosed GeRPs were identified by the FITC-labeled  $\beta$ -glucan shell. Populations of GeRP-containing macrophages were significantly greater in infarcted hearts than in non-infarcted hearts, and greater than the small numbers of GeRP-containing macrophages that had trafficked to extracardiac sites. Even in the absence of infarction, GeRP-containing macrophages were significantly greater in hearts than in extracardiac sites, demonstrating low levels of dissemination of intra-cardiac macrophages after phagocytosis of GeRPs delivered into the myocardium.

\*  $p < 0.01$  infarcted hearts vs. non-infarcted hearts

\*\* $p < 0.0001$  vs. all extracardiac sites in animals with infarcts

†  $p < 0.03$  vs. all extracardiac sites in animals without infarcts
