# Supplementary material for: Immunotherapy for Infarcts: In Vivo Postinfarction Macrophage Modulation Using Intramyocardial Microparticle Delivery of Map4k4 Small Interfering RNA
Source: PubMed Central journal article supplement (PMC7757732; doi:10.1089/biores.2020.0037), 2020-12-02
Supplement: Supp_Fig3.pdf [file Supp_Fig3.pdf]

## SUPPLEMENTARY DATA

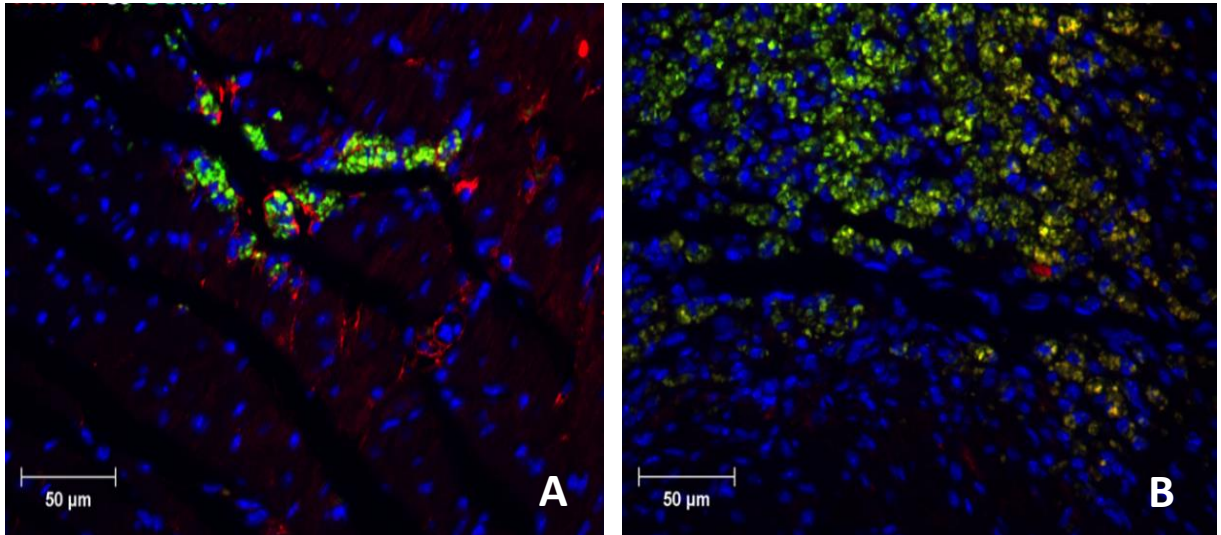

### C Relative *Tnf* transcription

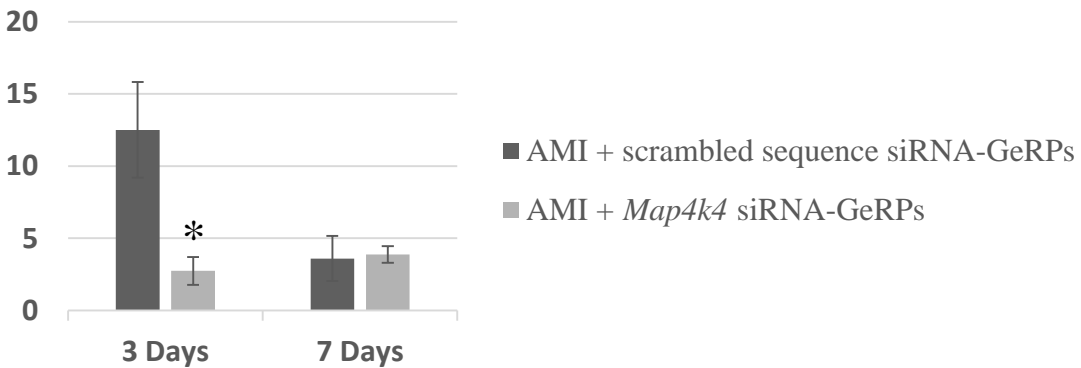

**SUPPLEMENTARY FIG. S3.** To clarify the TNF- $\alpha$  findings, another pilot was conducted, comparing intra-infarct delivery of *Map4k4*-targeted GeRPs to GeRPs containing scrambled siRNA (n=3), examining transcription and TNF- $\alpha$  protein expression in histologic cross-sections of whole hearts at 7 days following GeRP delivery. TNF- $\alpha$  was visualized in the infarct area by immunohistochemistry (red); GeRP particles were identified by their fluorescent label (green).

(A) Infarcted heart injected on Day 0 with GeRPs containing scrambled sequence siRNA. (B) Infarcted heart injected on Day 0 with GeRPs containing *Map4k4* siRNA, showing relatively less TNF- $\alpha$  protein expression co-localized with the *Map4k4*-targeted GeRPs.

(C) Whole heart *Tnf* transcripts at 3 and 7 days in hearts injected with scrambled sequence siRNA followed the same pattern seen in PBS-treated infarcted hearts. However, hearts with *Map4k4*-targeted GeRPs had a 78% reduction in transcript levels at 3 days (\* $p < 0.05$ ) which was no longer apparent at 7 days. Nonetheless, differences in protein expression were still evident on histology at 7 days within the infarct area at the site of GeRP delivery.
